# Supplementary material for: Overexpression of miR156 in switchgrass (Panicum virgatum L.) results in various morphological alterations and leads to improved biomass production
Source: PubMed Central journal article supplement (PMC3489066; doi:10.1111/j.1467-7652.2011.00677.x), 2012-05

**(a)**

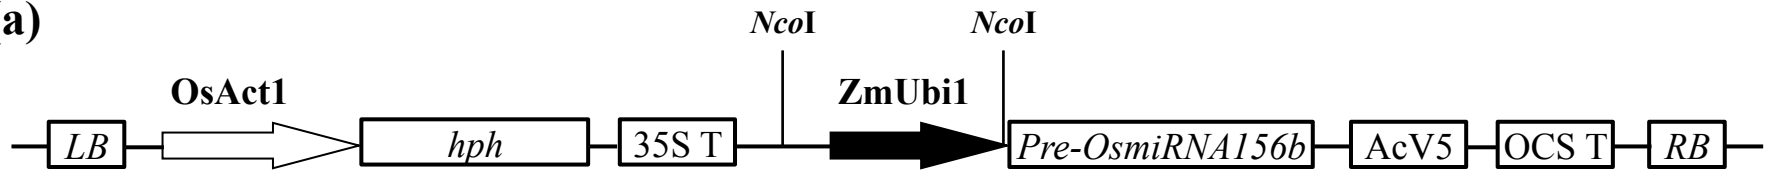

**(b)**

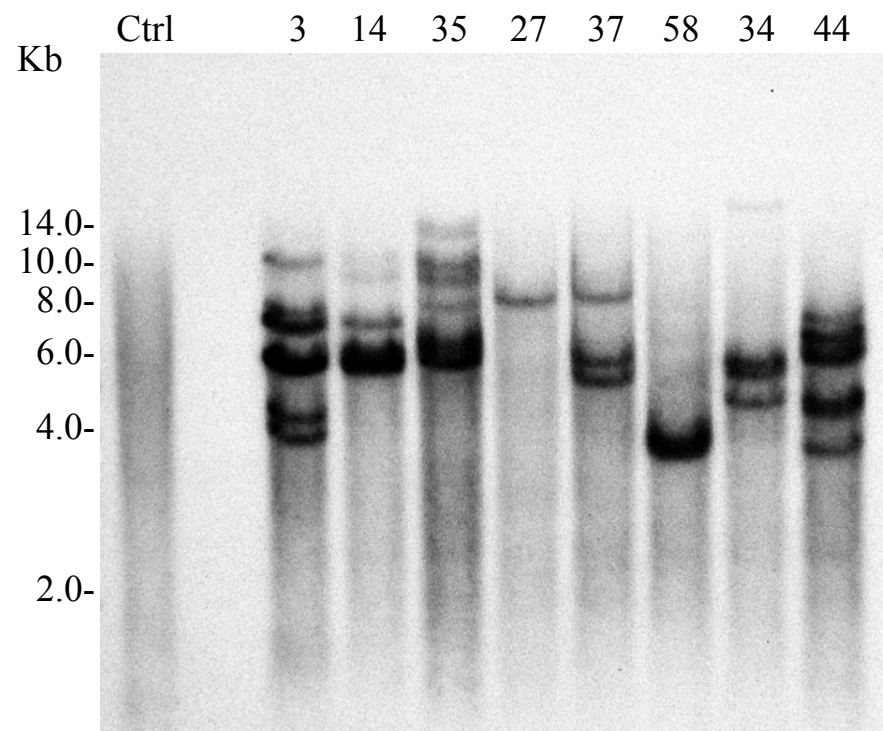

Supplement: pbi0010-0443-SD2.pdf [file pbi0010-0443-SD2.pdf]
